# Supplementary material
Source: PubMed Central journal article supplement (PMC8637867)
Supplement: AET2-5-e10709-s001.pdf [file AET2-5-e10709-s001.pdf]

**Supplemental Figure 1: Number of debriefs (solid line) and percentage of debriefs (dashed line) per year**

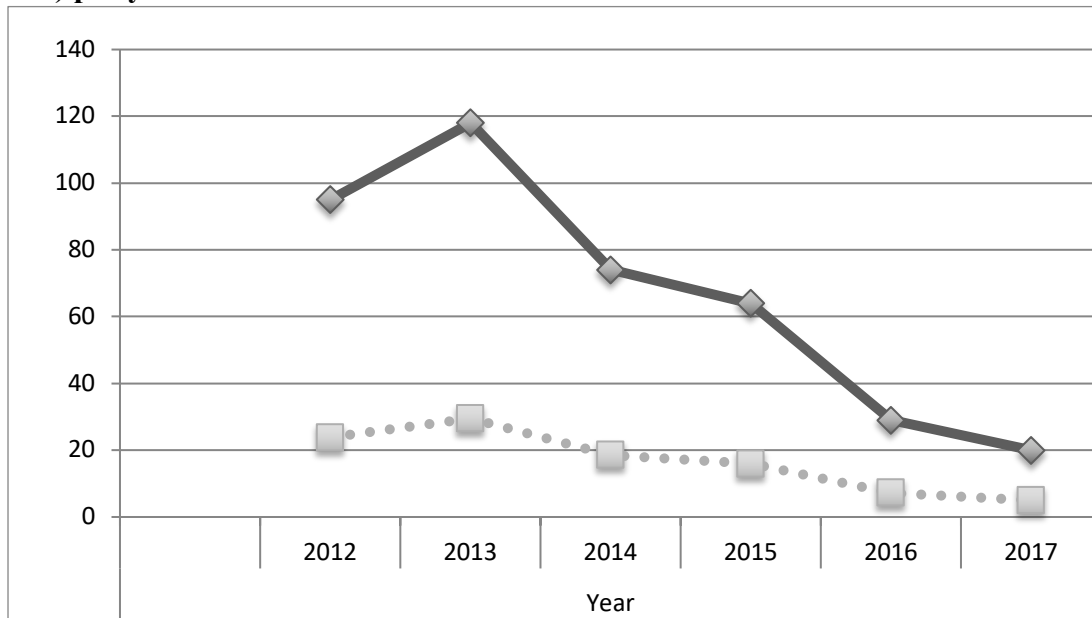

**Supplemental Figure 2: Five most frequently mentioned CRM principles, percentage of pertaining statements by year, 'What went well'**

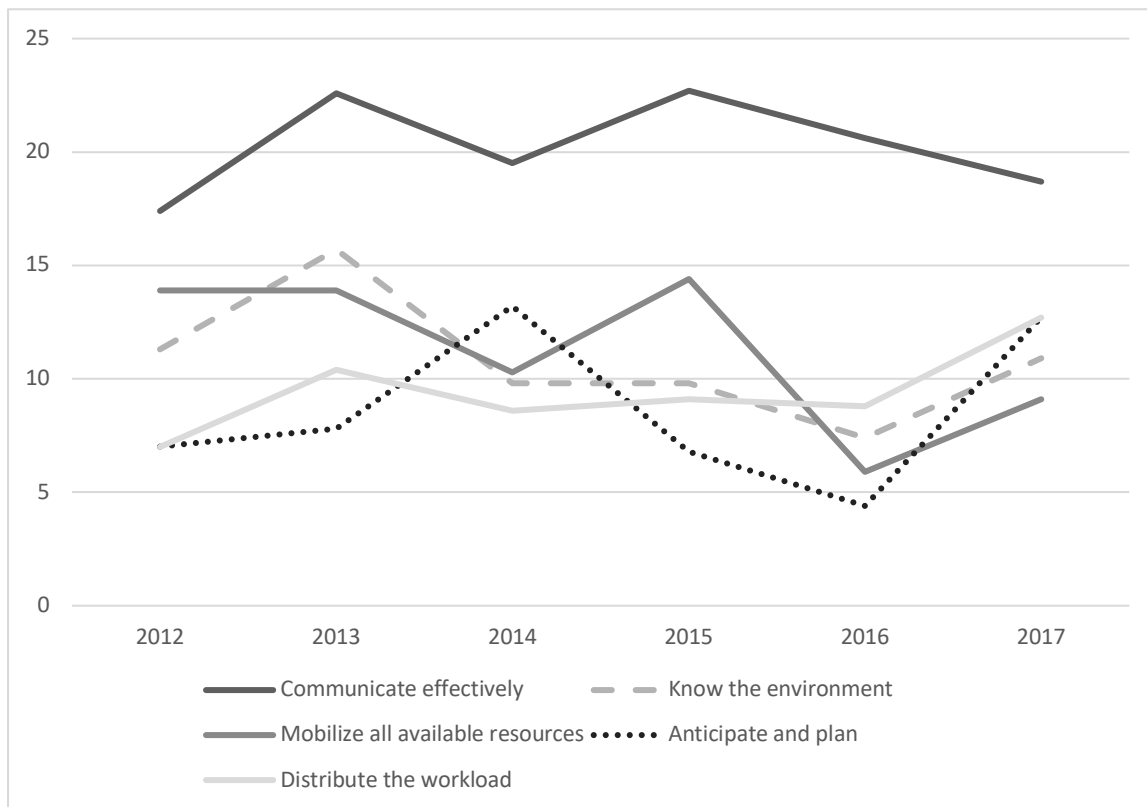

**Supplemental Table 1: Actionable item and educational statements**

| Category        | Illustrative Quotes (extracted from free text)                                                                                |
|-----------------|-------------------------------------------------------------------------------------------------------------------------------|
| Actionable item | Residents should have called attending sooner                                                                                 |
|                 | When a generalist calls for a sub-board to come evaluate a patient, there should be a policy for a 'response time' evaluation |
|                 | Truview blades in [site-specific location], change to difficult airway cart                                                   |
|                 | Team lead and documenter should stand closer to each other                                                                    |
| Education       | Learn art[erial] line setup                                                                                                   |
|                 | Which are the proper drugs for cold shock versus warm shock                                                                   |
|                 | Re-training on how to use defibrillator                                                                                       |
|                 | Need education on assessment of IO (intraosseous line) patency                                                                |

**Supplemental Figure 3: Five most frequently mentioned CRM principles, percentage of pertaining statements by year, 'What could have gone better'**

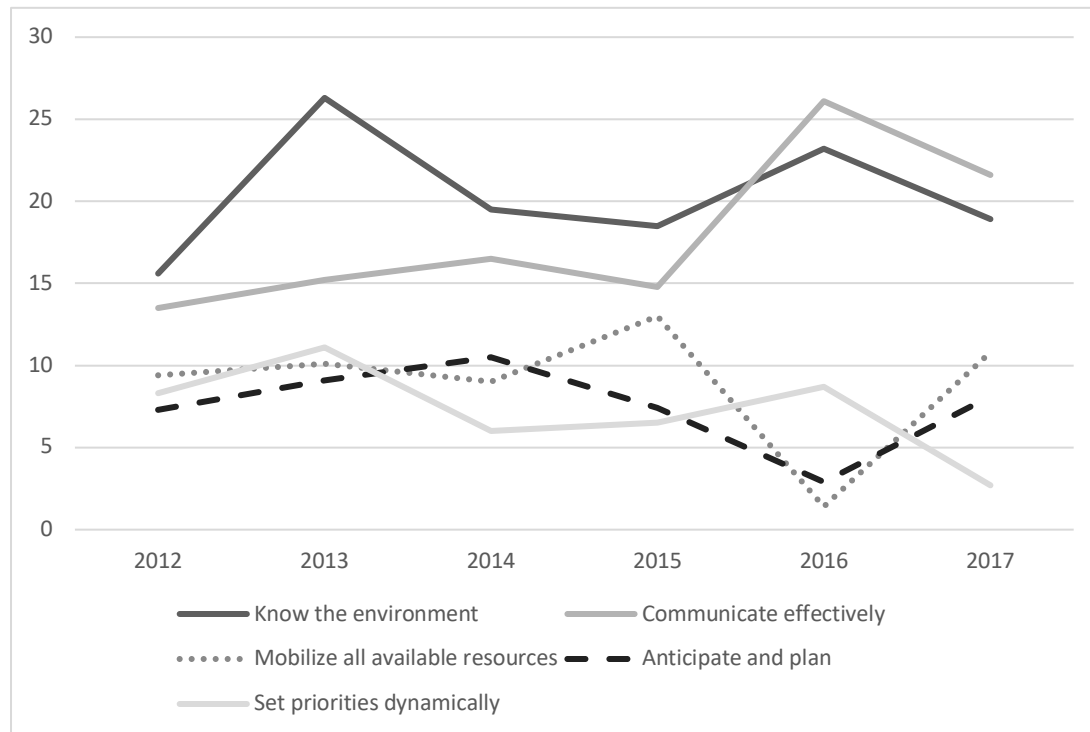

*CRM, crisis resource management*
